# Supplementary material for: Transcriptomic Analysis of Sex-Associated DEGs in Female and Male Flowers of Kiwifruit (Actinidia deliciosa [A. Chev] C. F. Liang & A. R. Ferguson)
Source: MDPI journal article supplement (doi:10.3390/horticulturae8010038), 2021-12-30
Supplement: s1 [file s1]

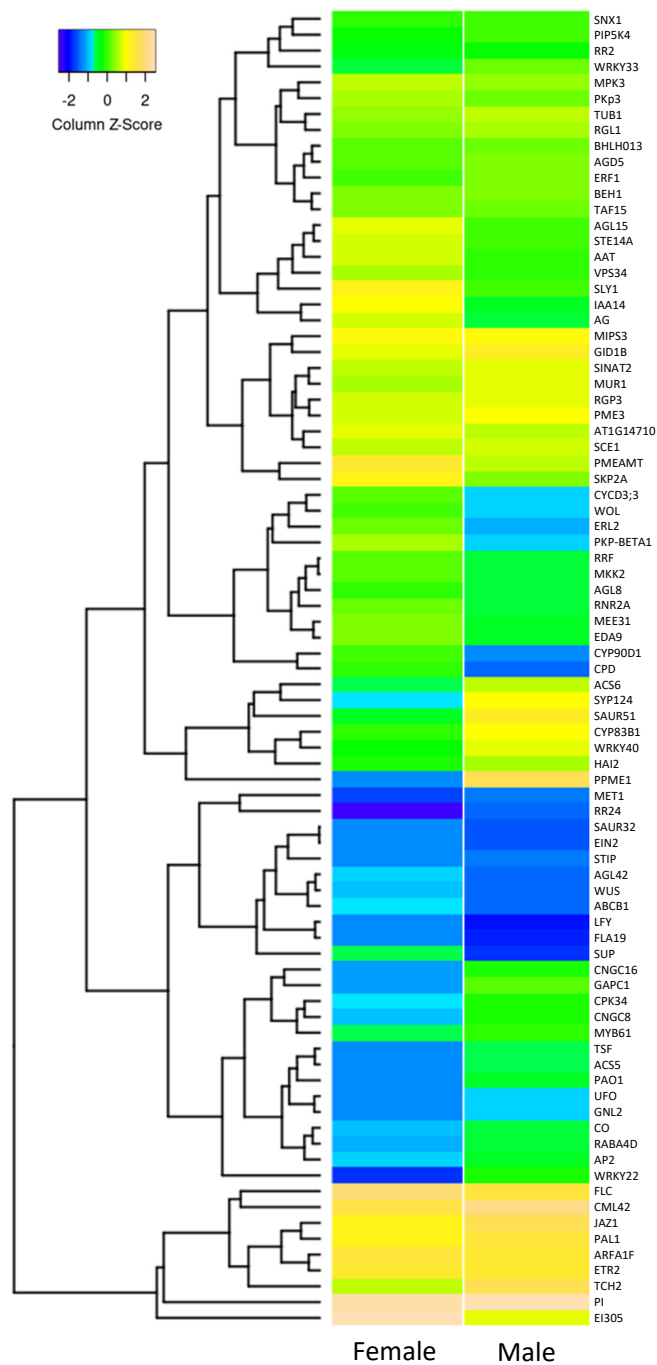

**Figure S1.** Heatmap of gene expression (FPKM) of genes displayed in the protein-protein interaction network expressed in female (H) and male (GxT) flowers using Heatmapper tool by Euclidean distance. The different colors correspond to the transformed value  $\log_{10}$ .

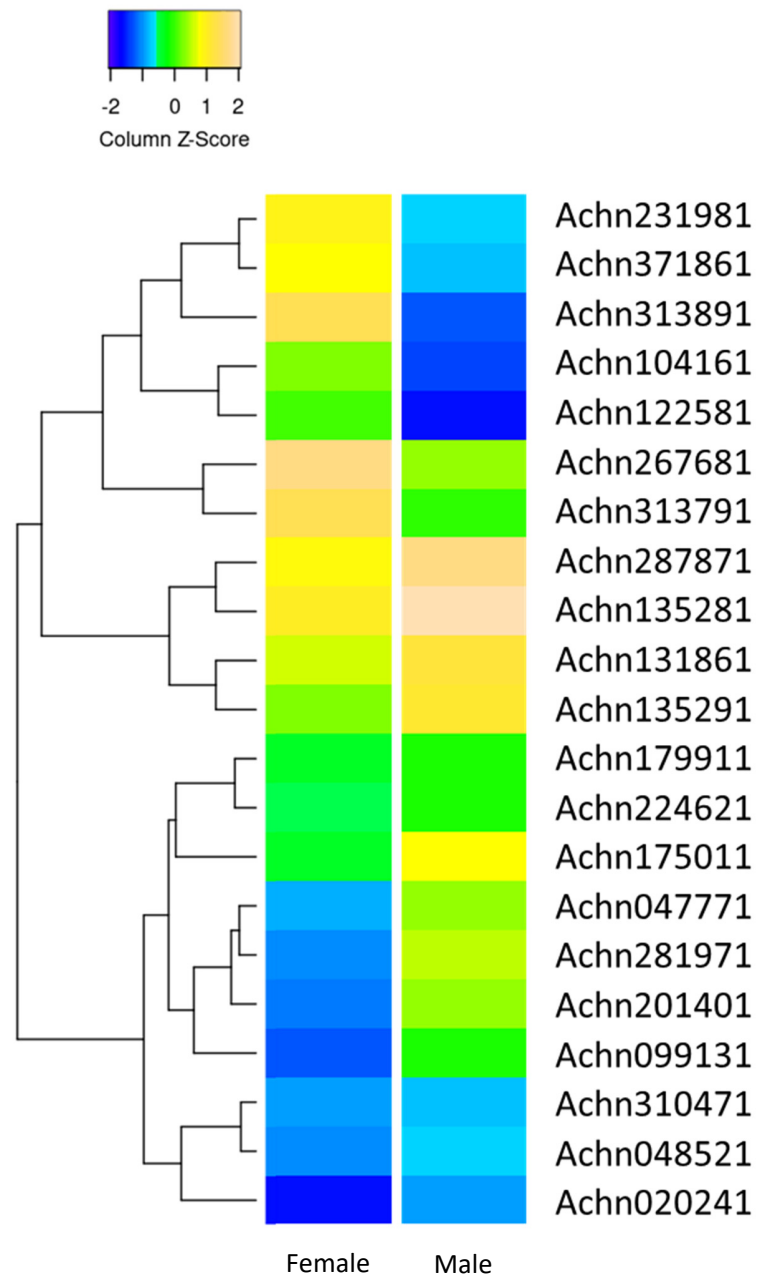

**Figure S2.** Heatmap of gene expression (FPKM) of genes associated with methyltransferase enzymes expressed in female (H) and male (GxT) flowers using Heatmapper tool by Euclidean distance. The different colors correspond to the transformed value  $\log_{10}$ .
